# Supplementary material for: Soil Quality Assessment in a Landslide Chronosequence of Indian Himalayan Region
Source: MDPI journal article supplement (doi:10.3390/land11101819), 2022-10-17
Supplement: s1 [file s1]

**Table S1.** Kaiser-Meyer-Olkin (KMO) and Bartlett's test.

|                                  |                    |          |
|----------------------------------|--------------------|----------|
| KMO Measure of Sampling Adequacy |                    | 0.836    |
| Bartlett's Test of Sphericity    | Approx. Chi-Square | 1033.097 |
|                                  | df                 | 91       |
|                                  | Sig.               | 0.000    |

**Table S2.** Correlation between different indicators of soil

|      | pH       | EC       | SOC      | MN       | AP       | AK       | BD       | PD       | TP       | MC       | Sand     | Silt    | Clay |
|------|----------|----------|----------|----------|----------|----------|----------|----------|----------|----------|----------|---------|------|
| pH   | 1        |          |          |          |          |          |          |          |          |          |          |         |      |
| EC   | -0.609** | 1        |          |          |          |          |          |          |          |          |          |         |      |
| SOC  | -0.769** | 0.776**  | 1        |          |          |          |          |          |          |          |          |         |      |
| MN   | -0.788** | 0.815**  | 0.923**  | 1        |          |          |          |          |          |          |          |         |      |
| AP   | -0.653** | 0.788**  | 0.890**  | 0.911**  | 1        |          |          |          |          |          |          |         |      |
| AK   | -0.769** | 0.786**  | 0.927**  | 0.968**  | 0.954**  | 1        |          |          |          |          |          |         |      |
| BD   | 0.793**  | -0.745** | -0.938** | -0.964** | -0.902** | -0.954** | 1        |          |          |          |          |         |      |
| PD   | 0.674**  | -0.694** | -0.909** | -0.885** | -0.848** | -0.854** | 0.923**  | 1        |          |          |          |         |      |
| TP   | -0.814** | 0.735**  | 0.909**  | 0.949**  | 0.877**  | 0.951**  | -0.897** | -0.828** | 1        |          |          |         |      |
| MC   | -0.641** | 0.727**  | 0.895**  | 0.862**  | 0.849**  | 0.891**  | -0.828** | -0.781** | 0.824**  | 1        |          |         |      |
| Sand | 0.651**  | -0.795** | -0.916** | -0.901** | -0.960** | -0.949** | 0.892**  | 0.818**  | -0.884** | -0.896** | 1        |         |      |
| Silt | -0.734** | 0.765**  | 0.913**  | 0.918**  | 0.939**  | 0.936**  | -0.932** | -0.877** | 0.906**  | 0.814**  | -0.944** | 1       |      |
| Clay | -0.489** | 0.733**  | 0.812**  | 0.778**  | 0.870**  | 0.851**  | -0.746** | -0.663** | 0.758**  | 0.877**  | -0.941** | 0.776** | 1    |

\*\*Correlation is significant at the 0.01 level (2-tailed).
